# Supplementary material
Source: PubMed Central journal article supplement (PMC5826114)
Supplement: AAC.02378-17_zac003186975s1.pdf [file AAC.02378-17_zac003186975s1.pdf]

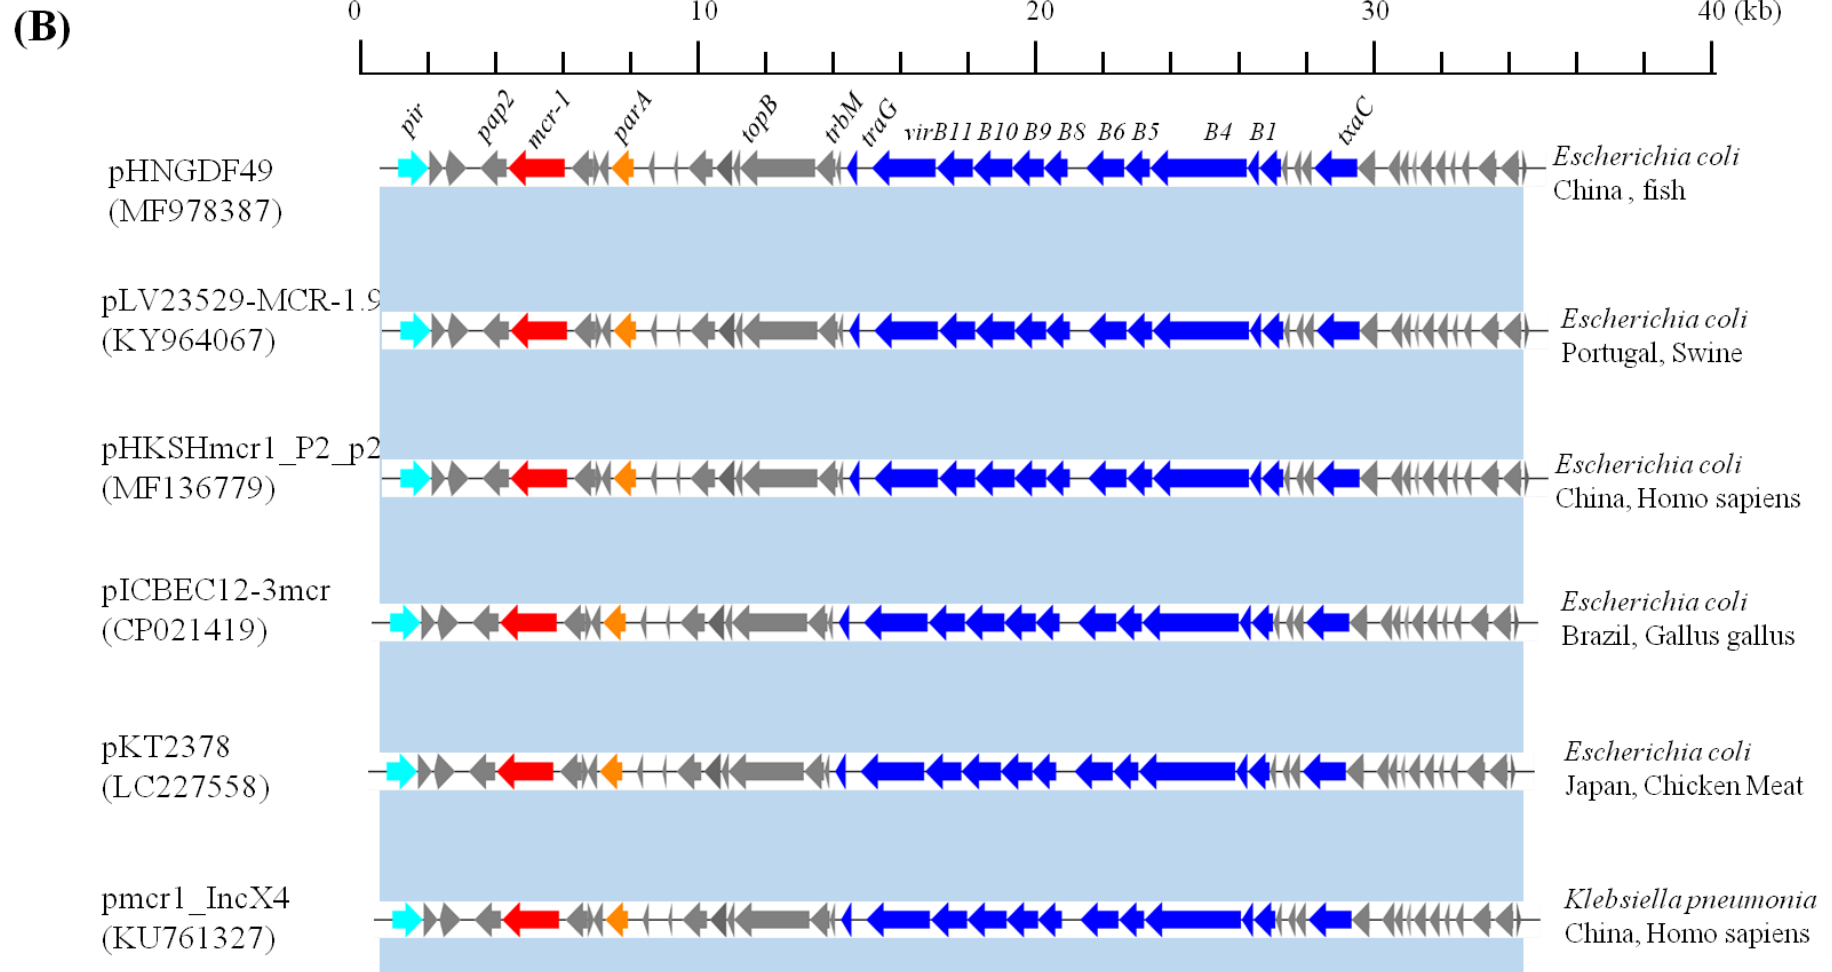

**Figure S1** (A) Linear comparison of six IncI2 type *mcr-1*-carrying plasmids with pHNGDF93; (B) Linear comparison of the five IncX4 type *mcr-1*-carrying plasmids with pHNGDF49. *mcr-1* gene was highlighted by red arrow. *tra* and *pil* genes were indicated in dark blue arrows.
